# Supplementary material for: Comparative Metabolomic Analysis of Four Fabaceae and Relationship to In Vitro Nematicidal Activity against Xiphinema index
Source: MDPI journal article supplement (doi:10.3390/molecules27103052), 2022-05-10
Supplement: s1 [file s1]

## Supplementary material

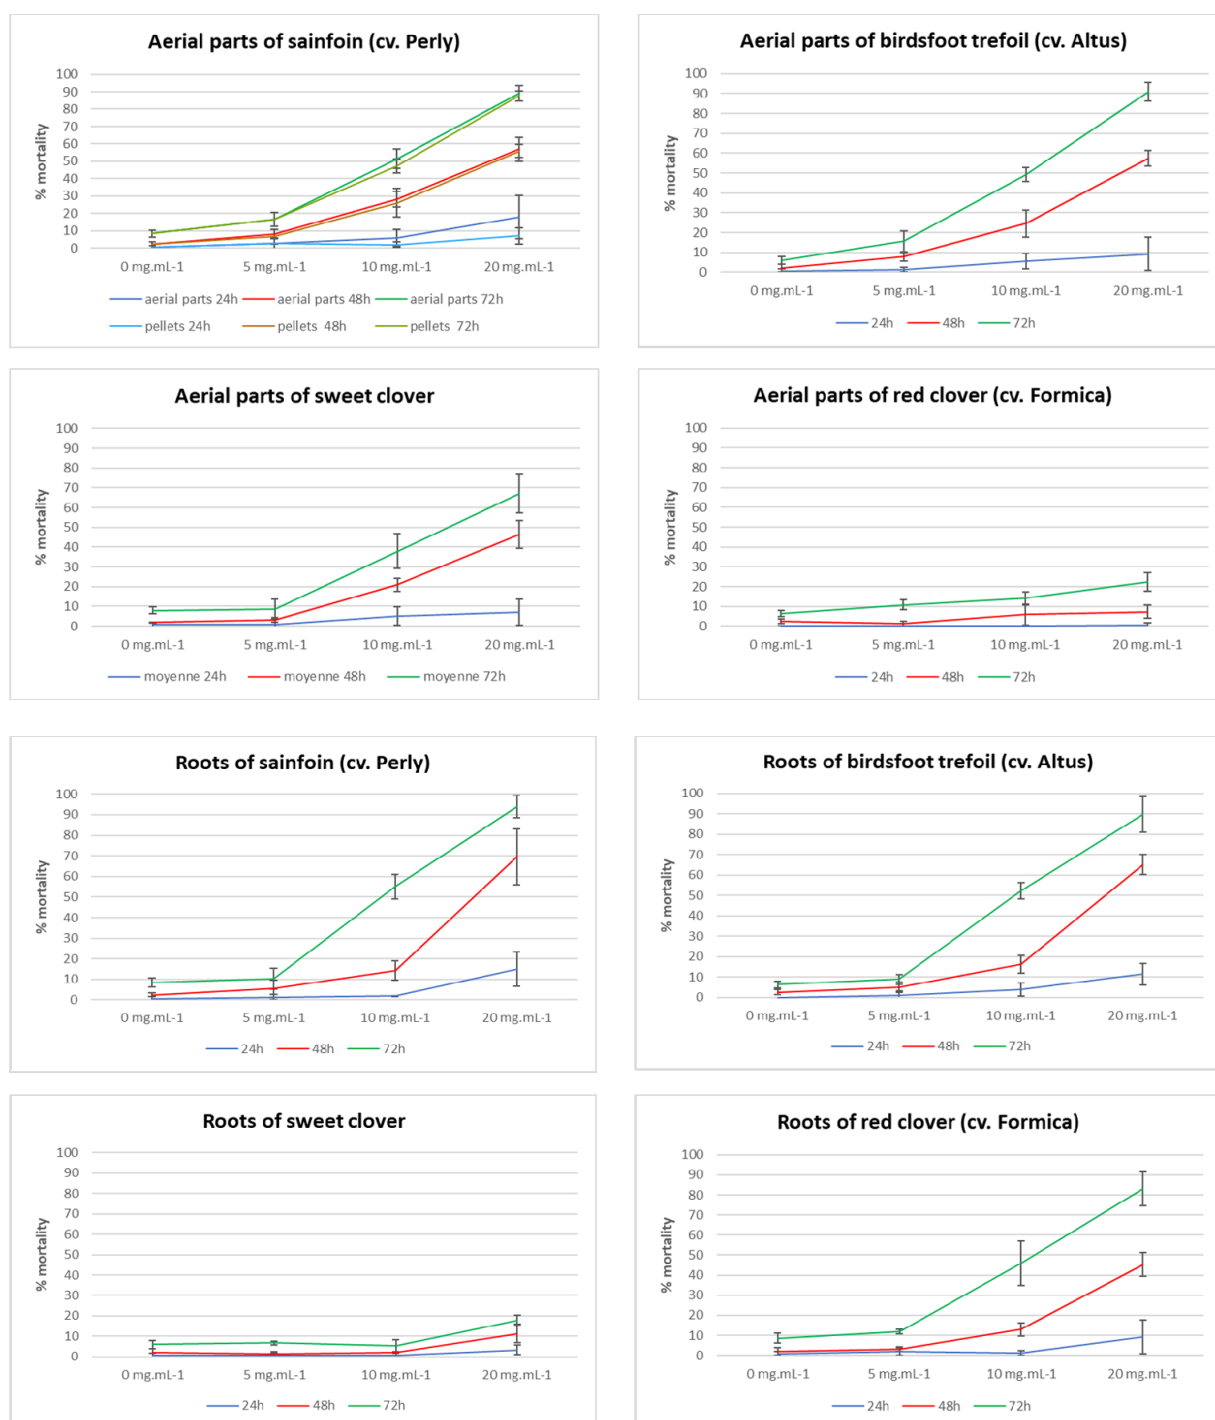

**Supplementary Figure S1.** Effect of aerial part and root extracts of Fabaceae on the mortality of *X. index* *in vitro*. Free *X. index* were incubated with indicated aerial part and root extracts. The extracts were concentrated at 0, 5, 10 or 20 g.L<sup>-1</sup>. Bioassays were monitored for 72 hours. The results presented correspond to three independent repetitions and bars indicate lowest and highest % mortality in the three repetitions.

**Supplementary Table S1.** List of the 93 target molecules for metabolomic analyses. *m/z* : mass-to-charge ratio; RT: retention time; Glc: glucoside; GlcA: glucuronide; Rha: rhamnoside; Rut: rutinose. Metabolites indicated with \* were not detected in quantifiable amounts in any of the plant extracts. Compounds indicated in bold were confirmed with authentic standards. Compounds indicated in italics were identified from the published literature.

| Molecule name                          | Abbreviation name                | Molecule family | Molecular formula                               | Theoretical <i>m/z</i> positive | Experimental <i>m/z</i> positive | Error positive (ppm) | Theoretical <i>m/z</i> negative | Experimental <i>m/z</i> negative | Error negative (ppm) | RT (min) |
|----------------------------------------|----------------------------------|-----------------|-------------------------------------------------|---------------------------------|----------------------------------|----------------------|---------------------------------|----------------------------------|----------------------|----------|
| <b>3-<i>O</i> -Caffeoylquinic acid</b> | 3- <i>O</i> -Caffeoylquinic acid | Cinnamic acid   | C <sub>16</sub> H <sub>18</sub> O <sub>9</sub>  | 355.10235                       | 355.10246                        | 0.1                  | 353.0878                        | 353.0864                         | -4.1                 | 2.46     |
| <b>4-<i>O</i> -Caffeoylquinic acid</b> | 4- <i>O</i> -Caffeoylquinic acid | Cinnamic acid   | C <sub>16</sub> H <sub>18</sub> O <sub>9</sub>  | 355.10235                       | 355.10235                        | 0.0                  | 353.0878                        | 353.0863                         | -4.3                 | 2.62     |
| <b>5-<i>O</i> -Caffeoylquinic acid</b> | 5- <i>O</i> -Caffeoylquinic acid | Cinnamic acid   | C <sub>16</sub> H <sub>18</sub> O <sub>9</sub>  | 355.10235                       | 355.10234                        | 0.1                  | 353.0878                        | 353.0863                         | -4.3                 | 2.10     |
| <b>Caffeic acid</b>                    | Caffeic acid                     | Cinnamic acid   | C <sub>9</sub> H <sub>8</sub> O <sub>4</sub>    | 181.04953                       | 181.04951                        | 0.1                  | 179.0350                        | 179.0342                         | -4.6                 | 3.39     |
| <b>Cinnamic acid*</b>                  | Cinnamic acid                    | Cinnamic acid   | C <sub>9</sub> H <sub>8</sub> O <sub>2</sub>    | 149.05971                       | 149.05971                        | 0.0                  | 147.0452                        | 147.0448                         | -2.3                 | 7.91     |
| <i>Clovamide</i>                       | Clovamide                        | Cinnamic acid   | C <sub>18</sub> H <sub>17</sub> NO <sub>7</sub> | 360.10763                       | 360.10763                        | -0.4                 | 358.0917                        | 358.0917                         | -4.1                 | 3.76     |
| <b>Ferulic acid</b>                    | Ferulic acid                     | Cinnamic acid   | C <sub>10</sub> H <sub>10</sub> O <sub>4</sub>  | 195.06518                       | 195.06534                        | 0.8                  | 193.0506                        | 193.0498                         | -4.5                 | 5.27     |
| <b>Glucosyl-<i>o</i>-coumaric acid</b> | Glc- <i>o</i> -coumaric acid     | Cinnamic acid   | C <sub>15</sub> H <sub>18</sub> O <sub>8</sub>  | 327.10744                       | 327.10768                        | 0.7                  | 325.0929                        | 325.0915                         | -4.2                 | 3.34     |
| <i>Glucosyl-<i>p</i>-coumaric acid</i> | Glc- <i>p</i> -coumaric acid     | Cinnamic acid   | C <sub>15</sub> H <sub>17</sub> O <sub>8</sub>  | 327.10744                       | 327.10751                        | 0.2                  | 325.0929                        | 325.0918                         | -3.4                 | 4.28     |
| <b><i>m</i>-Coumaric acid</b>          | <i>m</i> -Coumaric acid          | Cinnamic acid   | C <sub>9</sub> H <sub>8</sub> O <sub>3</sub>    | 165.05462                       | 165.05469                        | 0.4                  | 163.0401                        | 163.0392                         | -5.0                 | 6.18     |
| <b><i>o</i>-Coumaric acid</b>          | <i>o</i> -Coumaric acid          | Cinnamic acid   | C <sub>9</sub> H <sub>8</sub> O <sub>3</sub>    | 165.05462                       | 165.05471                        | 0.5                  | 163.0401                        | 163.0393                         | -4.8                 | 6.98     |
| <b><i>p</i>-Coumaric cid</b>           | <i>p</i> -Coumaric acid          | Cinnamic acid   | C <sub>9</sub> H <sub>8</sub> O <sub>3</sub>    | 165.05462                       | 165.05472                        | 0.6                  | 163.0401                        | 163.0394                         | -3.8                 | 4.79     |
| <i>Phaseolic acid</i>                  | Phaseolic acid                   | Cinnamic acid   | C <sub>13</sub> H <sub>12</sub> O <sub>8</sub>  | 297.06049                       | 297.06060                        | 0.4                  | 295.0459                        | 295.0445                         | -5.0                 | 4.04     |
| <b>Sinapic acid</b>                    | Sinapic acid                     | Cinnamic acid   | C <sub>11</sub> H <sub>12</sub> O <sub>5</sub>  | 225.07575                       | 225.07579                        | 0.2                  | 223.0612                        | 223.0601                         | -4.9                 | 5.04     |
| <b>Catechin</b>                        | Catechin                         | Flavanol        | C <sub>15</sub> H <sub>14</sub> O <sub>6</sub>  | 291.08631                       | 291.08631                        | 0.0                  | 289.0718                        | 289.0707                         | -3.6                 | 2.60     |
| <b>Epicatechin</b>                     | Epicatechin                      | Flavanol        | C <sub>15</sub> H <sub>14</sub> O <sub>6</sub>  | 291.08631                       | 291.08632                        | -0.3                 | 289.0718                        | 289.0708                         | -3.5                 | 2.99     |
| <b>Epicatechin gallate*</b>            | Epicatechin gallate              | Flavanol        | C <sub>22</sub> H <sub>18</sub> O <sub>10</sub> | 443.09727                       | 443.09727                        | -0.1                 | 441.0816                        | 441.0816                         | -2.5                 | 4.60     |
| <b>Epigallocatechin</b>                | Epigallocatechin                 | Flavanol        | C <sub>15</sub> H <sub>14</sub> O <sub>7</sub>  | 307.08122                       | 307.08132                        | 0.3                  | 305.0667                        | 305.0660                         | -2.2                 | 2.25     |
| <b>Epigallocatechin gallate*</b>       | Epigallocatechin gallate         | Flavanol        | C <sub>22</sub> H <sub>18</sub> O <sub>11</sub> | 459.09218                       | 459.09218                        | -0.2                 | 457.0776                        | 457.0764                         | -2.7                 | 3.10     |
| <b>Gallocatechin</b>                   | Gallocatechin                    | Flavanol        | C <sub>15</sub> H <sub>14</sub> O <sub>7</sub>  | 307.08122                       | 307.08129                        | 0.2                  | 305.0667                        | 305.0661                         | -1.8                 | 2.10     |
| <b>Apigenin</b>                        | Apigenin                         | Flavonoid       | C <sub>15</sub> H <sub>10</sub> O <sub>5</sub>  | 271.06009                       | 271.06015                        | 0.2                  | 269.0455                        | 269.0448                         | -2.7                 | 7.58     |
| <b>Apigenin-7-<i>O</i> -glucoside</b>  | Apigenin-7- <i>O</i> -Glc        | Flavonoid       | C <sub>21</sub> H <sub>20</sub> O <sub>10</sub> | 433.11292                       | 433.11301                        | 0.2                  | 431.0984                        | 431.0965                         | -4.3                 | 5.83     |
| <b>Apigenin-8-<i>C</i> -glucoside</b>  | Apigenin-8- <i>C</i> -glc        | Flavonoid       | C <sub>21</sub> H <sub>20</sub> O <sub>10</sub> | 433.11292                       | 433.11298                        | 0.1                  | 431.0984                        | 431.0966                         | -4.1                 | 3.33     |
| <b>Baicalein</b>                       | Baicalein                        | Flavonoid       | C <sub>15</sub> H <sub>10</sub> O <sub>5</sub>  | 271.06009                       | 271.05999                        | -0.4                 | 269.0455                        | 269.0445                         | -3.7                 | 8.06     |

|                                                                       |                         |           |                      |           |           |      |          |          |      |      |
|-----------------------------------------------------------------------|-------------------------|-----------|----------------------|-----------|-----------|------|----------|----------|------|------|
| <b>Chrysoeriol</b>                                                    | Chrysoeriol             | Flavonoid | $C_{16}H_{12}O_6$    | 301.07066 | 301.07068 | 0.1  | 299.0561 | 299.0550 | -3.7 | 8.10 |
| <i>Chrysoeriol-4'-O-beta-D-glucoside</i>                              | Chrysoeriol-4'-O-Glc    | Flavonoid | $C_{22}H_{22}O_{11}$ | 463.12348 | 463.12346 | -0.1 | 461.1089 | 461.1076 | -2.9 | 5.80 |
| Chrysoeriol-glucuronide                                               | Chrysoeriol-GlcA        | Flavonoid | $C_{22}H_{20}O_{12}$ | 477.10275 | 477.10301 | 0.5  | 475.0882 | 475.0872 | -2.2 | 6.30 |
| Chrysoeriol-malonyl-glucoside                                         | Chrysoeriol-malonyl-Glc | Flavonoid | $C_{25}H_{24}O_{14}$ | 549.12388 | 549.12406 | 0.3  | 547.1093 | 547.1082 | -2.0 | 6.89 |
| Chrysoeriol-rutinoside                                                | Chrysoeriol-Rut         | Flavonoid | $C_{28}H_{32}O_{15}$ | 609.18139 | 609.18145 | 0.1  | 607.1668 | 607.1654 | -2.3 | 5.00 |
| <b>Diosmetin-7-O-rutinoside*</b>                                      | Diosmetin-7-O-Rut       | Flavonoid | $C_{28}H_{32}O_{15}$ | 609.18139 | 609.18137 | -0.1 | 607.1668 | 607.1655 | -2.2 | 5.15 |
| <b>Formononetin</b>                                                   | Formononetin            | Flavonoid | $C_{16}H_{12}O_4$    | 269.08083 | 269.08083 | 0.0  | 267.0663 | 267.0652 | -4.1 | 8.95 |
| <b>Formononetin-7-O-glucoside</b>                                     | Formononetin-7-O-Glc    | Flavonoid | $C_{22}H_{22}O_9$    | 431.13366 | 431.13370 | 0.1  | 429.1191 | 429.1175 | -3.7 | 6.79 |
| <b>Genistein</b>                                                      | Genistein               | Flavonoid | $C_{15}H_{10}O_5$    | 271.06009 | 271.06018 | 0.3  | 269.0455 | 269.0444 | -4.2 | 8.04 |
| <b>Genistein-7-O-glucoside</b>                                        | Genistein-7-O-Glc       | Flavonoid | $C_{21}H_{20}O_{10}$ | 433.11292 | 433.11293 | 0.2  | 431.0984 | 431.0965 | -4.3 | 4.77 |
| <b>Isorhamnetin</b>                                                   | Isorhamnetin            | Flavonoid | $C_{16}H_{12}O_7$    | 317.06557 | 317.06561 | 0.1  | 315.0510 | 315.0498 | -3.8 | 8.53 |
| <b>Isorhamnetin-3-O-rutinoside</b>                                    | Isorhamnetin-3-O-Rut    | Flavonoid | $C_{28}H_{32}O_{16}$ | 625.17631 | 625.17631 | 0.1  | 623.1618 | 623.1590 | -4.4 | 4.90 |
| Isorhamnetin-glucoside                                                | Isorhamnetin-Glc        | Flavonoid | $C_{22}H_{22}O_{12}$ | 479.11840 | 479.11859 | 0.4  | 477.1038 | 477.1019 | -4.0 | 5.42 |
| <b>Kaempferol</b>                                                     | Kaempferol              | Flavonoid | $C_{15}H_{10}O_6$    | 287.05501 | 287.05506 | 0.2  | 285.0405 | 285.0392 | -4.4 | 8.13 |
| <i>Kaempferol-3-(2'',6''-di-O-alpha-L-rhamnosyl)-beta-D-glucoside</i> | Kaempferol-Glc-Rha-Rha  | Flavonoid | $C_{33}H_{40}O_{19}$ | 741.22366 | 741.22353 | -0.2 | 739.2091 | 739.2062 | -3.9 | 3.33 |
| <b>Kaempferol-3-O-glucoside</b>                                       | Kaempferol-3-O-Glc      | Flavonoid | $C_{21}H_{20}O_{11}$ | 449.10783 | 449.10784 | 0.0  | 447.0933 | 447.0914 | -4.2 | 5.52 |
| <b>Kaempferol-3-O-rhamnoside</b>                                      | Kaempferol-3-O-Rha      | Flavonoid | $C_{21}H_{20}O_{10}$ | 433.11292 | 433.11295 | 0.1  | 431.0984 | 431.0965 | -4.3 | 6.72 |
| <b>kaempferol-3-O-rutinoside</b>                                      | kaempferol-3-O-Rut      | Flavonoid | $C_{27}H_{30}O_{15}$ | 595.16574 | 595.16584 | 0.2  | 593.1512 | 593.1488 | -4.0 | 4.59 |
| <b>Kaempferol-7-O-neohesperidoside</b>                                | Kaempferol-7-O-neohesp  | Flavonoid | $C_{27}H_{30}O_{15}$ | 595.16574 | 595.16602 | 0.7  | 593.1512 | 593.1485 | -4.5 | 5.11 |
| Kaempferol-glucuronide                                                | Kaempferol-GluA         | Flavonoid | $C_{21}H_{18}O_{12}$ | 463.08710 | 463.08720 | 0.2  | 461.0725 | 461.0710 | -3.4 | 5.75 |
| Kaempferol-rhamnoyl-glucosyl-rhamoside_1                              | Kaempferol-Rha-Glc-Rha1 | Flavonoid | $C_{33}H_{40}O_{19}$ | 741.22366 | 741.22372 | 0.1  | 739.2091 | 739.2066 | -3.4 | 1.99 |
| Kaempferol-rhamnoyl-glucosyl-rhamoside_2                              | Kaempferol-Rha-Glc-Rha2 | Flavonoid | $C_{33}H_{40}O_{19}$ | 741.22366 | 741.22370 | 0.1  | 739.2091 | 739.2064 | -3.6 | 2.75 |
| <b>Luteolin</b>                                                       | Luteolin                | Flavonoid | $C_{15}H_{10}O_6$    | 287.05501 | 287.05505 | 0.1  | 285.0405 | 285.0405 | n.d. | 7.50 |
| <b>Luteolin-4'-O-glucoside</b>                                        | Luteolin-4'-O-Glc       | Flavonoid | $C_{21}H_{20}O_{11}$ | 449.10783 | 449.10789 | 0.2  | 447.0933 | 447.0914 | -4.3 | 5.58 |
| <b>Luteolin-7-O-glucoside</b>                                         | Luteolin-7-O-Glc        | Flavonoid | $C_{21}H_{20}O_{11}$ | 449.10783 | 449.10795 | 0.3  | 447.0933 | 447.0922 | -2.5 | 4.37 |

|                                                                    |                       |              |                                                 |           |           |      |          |          |      |       |
|--------------------------------------------------------------------|-----------------------|--------------|-------------------------------------------------|-----------|-----------|------|----------|----------|------|-------|
| <b>Luteolin-7-O -glucuronide*</b>                                  | Luteolin-7-O-GlcA     | Flavonoid    | C <sub>21</sub> H <sub>18</sub> O <sub>12</sub> | 463.08710 | 463.08712 | 0.0  | 461.0725 | 461.0713 | -2.6 | 5.01  |
| <b>Luteolin-7-O -rutinose</b>                                      | Luteolin-7-O-Rut      | Flavonoid    | C <sub>27</sub> H <sub>30</sub> O <sub>15</sub> | 595.16574 | 595.16601 | 0.4  | 593.1512 | 593.1491 | -3.5 | 3.76  |
| <b>Luteolin-8-C -glucoside</b>                                     | Luteolin-8-C-Glc      | Flavonoid    | C <sub>21</sub> H <sub>20</sub> O <sub>11</sub> | 449.10783 | 449.10779 | -0.1 | 447.0933 | 447.0918 | -3.4 | 3.36  |
| Luteolin-Rhamnosyl-Rhamnoside                                      | Luteolin-Rha-Rha      | Flavonoid    | C <sub>27</sub> H <sub>30</sub> O <sub>14</sub> | 579.17083 | 579.17089 | 0.1  | 577.1563 | 577.1538 | -4.4 | 4.40  |
| <b>Myricetin</b>                                                   | Myricetin             | Flavonoid    | C <sub>15</sub> H <sub>10</sub> O <sub>8</sub>  | 319.04484 | 319.04486 | 0.1  | 317.0303 | 317.0293 | -3.3 | 6.84  |
| <b>Myricetin-3-O -rhamnoside</b>                                   | Myricetin-3-O-Rha     | Flavonoid    | C <sub>21</sub> H <sub>20</sub> O <sub>12</sub> | 465.10275 | 465.10295 | 0.4  | 463.0874 | 463.0863 | -4.2 | 4.19  |
| <b>Prunetin</b>                                                    | Prunetin              | Flavonoid    | C <sub>16</sub> H <sub>12</sub> O <sub>5</sub>  | 285.07575 | 285.07575 | -0.9 | 283.0612 | 283.0599 | -4.5 | 9.71  |
| <b>Quercetin</b>                                                   | Quercetin             | Flavonoid    | C <sub>15</sub> H <sub>10</sub> O <sub>7</sub>  | 303.04993 | 303.04997 | 0.1  | 301.0343 | 301.0339 | -4.7 | 7.36  |
| <i>Quercetin-3-(2",6"-di-O-alpha-L-rhamnosyl)-beta-D-glucoside</i> | Quercetin-Glc-Rha-Rha | Flavonoid    | C <sub>33</sub> H <sub>40</sub> O <sub>20</sub> | 757.21857 | 757.21863 | 0.1  | 755.2040 | 755.2008 | -4.3 | 2.73  |
| <b>Quercetin-3-O- glucoside</b>                                    | Quercetin-3-O-Glc     | Flavonoid    | C <sub>21</sub> H <sub>20</sub> O <sub>12</sub> | 465.10275 | 465.10294 | 0.4  | 463.0882 | 463.0864 | -3.8 | 4.35  |
| <b>Quercetin-3-O- glucuronide</b>                                  | Quercetin-3-O-GlcA    | Flavonoid    | C <sub>21</sub> H <sub>18</sub> O <sub>13</sub> | 479.08201 | 479.08215 | 0.3  | 477.0675 | 477.0665 | -2.1 | 5.25  |
| <b>Quercetin-3-O- rhamnoside</b>                                   | Quercetin-3-O-Rha     | Flavonoid    | C <sub>21</sub> H <sub>20</sub> O <sub>11</sub> | 449.10783 | 449.10789 | 0.2  | 447.0933 | 447.0914 | -4.2 | 5.70  |
| <b>Quercetin-3-O -rutinose</b>                                     | Quercetin-3-O-Rut     | Flavonoid    | C <sub>27</sub> H <sub>30</sub> O <sub>16</sub> | 611.16066 | 611.16060 | -0.1 | 609.1461 | 609.1433 | -4.5 | 3.75  |
| <b>Rhamnetin*</b>                                                  | Rhamnetin             | Flavonoid    | C <sub>16</sub> H <sub>12</sub> O <sub>7</sub>  | 317.06557 | 317.06560 | 0.1  | 315.0510 | 315.0501 | -2.9 | 9.07  |
| <b>Syringetin*</b>                                                 | Syringetin            | Flavonoid    | C <sub>17</sub> H <sub>14</sub> O <sub>8</sub>  | 347.07614 | 347.07607 | -0.2 | 345.0616 | 345.0546 | -3.2 | 8.33  |
| <b>Syringetin-3-O -glucoside*</b>                                  | Syringetin-3-O-Glc    | Flavonoid    | C <sub>23</sub> H <sub>24</sub> O <sub>13</sub> | 509.12896 | 509.12888 | -0.2 | 507.1144 | 507.1101 | -2.2 | 5.53  |
| <b>Ascorbic acid</b>                                               | Ascorbic acid         | Organic acid | C <sub>6</sub> H <sub>8</sub> O <sub>6</sub>    | 177.03936 | 177.03936 | 0.0  | 175.0248 | 175.0240 | -4.9 | 1.45  |
| <b>Citramalic acid</b>                                             | Citramalic acid       | Organic acid | C <sub>5</sub> H <sub>8</sub> O <sub>5</sub>    | 149.04444 | 149.04436 | -0.6 | 147.0299 | 147.0292 | -4.7 | 1.78  |
| <b>Citric acid</b>                                                 | Citric acid           | Organic acid | C <sub>6</sub> H <sub>8</sub> O <sub>7</sub>    | 193.03427 | 193.03442 | 0.7  | 191.0197 | 191.0191 | -3.3 | 1.76  |
| <b>Ellagic acid*</b>                                               | Ellagic acid*         | Organic acid | C <sub>14</sub> H <sub>6</sub> O <sub>8</sub>   | 303.01354 | 303.01349 | -0.2 | 300.9990 | 300.9977 | -4.3 | 4.60  |
| <b>Gallic acid</b>                                                 | Gallic acid           | Organic acid | C <sub>7</sub> H <sub>6</sub> O <sub>5</sub>    | 171.02879 | 171.02882 | 0.1  | 169.0142 | 169.0137 | -3.2 | 1.80  |
| <b>Linoleic acid*</b>                                              | Linoleic acid         | Organic acid | C <sub>18</sub> H <sub>32</sub> O <sub>2</sub>  | 281.24750 | 281.24741 | -0.4 | 279.2330 | 279.2330 | n.d. | 11.27 |
| <b>Linolenic acid</b>                                              | Linolenic acid        | Organic acid | C <sub>18</sub> H <sub>30</sub> O <sub>2</sub>  | 279.23185 | 279.23183 | -0.1 | 277.2173 | 277.2173 | n.d. | 10.05 |
| <b>Malic acid</b>                                                  | Malic acid            | Organic acid | C <sub>4</sub> H <sub>6</sub> O <sub>5</sub>    | 135.02879 | 135.02879 | n.d. | 133.0142 | 133.0138 | -3.4 | 1.58  |
| <b>Quinic acid</b>                                                 | Quinic acid           | Organic acid | C <sub>7</sub> H <sub>12</sub> O <sub>6</sub>   | 193.07066 | 193.07065 | -0.1 | 191.0561 | 191.0554 | -3.7 | 1.42  |
| <b>Succinic acid</b>                                               | Succinic acid         | Organic acid | C <sub>4</sub> H <sub>6</sub> O <sub>4</sub>    | 119.03388 | 119.03388 | n.d. | 117.0193 | 117.0189 | -3.7 | 1.65  |

|                         |                         |                  |                      |            |            |      |           |           |      |      |
|-------------------------|-------------------------|------------------|----------------------|------------|------------|------|-----------|-----------|------|------|
| <b>Arbutin*</b>         | Arbutin                 | Phenolics        | $C_{12}H_{16}O_7$    | 273.09688  | 273.09687  | 0.0  | 271.0823  | 271.0811  | -4.5 | 1.60 |
| <b>Procyanidin A1*</b>  | Procyanidin A1          | Proanthocyanidin | $C_{30}H_{24}O_{13}$ | 593.12896  | 593.12899  | 0.2  | 591.1144  | 591.1128  | -2.7 | 3.97 |
| <b>Procyanidin A2</b>   | Procyanidin A2          | Proanthocyanidin | $C_{30}H_{24}O_{12}$ | 577.13405  | 577.13412  | 0.1  | 575.1195  | 575.1174  | -3.4 | 4.75 |
| <b>Procyanidin B1</b>   | Procyanidin B1          | Proanthocyanidin | $C_{30}H_{26}O_{12}$ | 579.14970  | 579.14996  | 0.4  | 577.1351  | 577.1329  | -3.9 | 2.04 |
| <b>Procyanidin B2</b>   | Procyanidin B2          | Proanthocyanidin | $C_{30}H_{26}O_{12}$ | 579.14970  | 579.15002  | 0.5  | 577.1351  | 577.1330  | -3.7 | 2.49 |
| <b>Procyanidin C2</b>   | Procyanidin C2          | Proanthocyanidin | $C_{45}H_{38}O_{18}$ | 867.21309  | 867.21279  | -0.3 | 865.1985  | 865.1957  | -3.3 | 2.36 |
| Prodelphinidin dimer1   | Prodelphinidin dimer1   | Proanthocyanidin | $C_{30}H_{26}O_{13}$ | 595.14461  | 595.14490  | 0.5  | 593.1301  | 593.1278  | -3.8 | 1.80 |
| Prodelphinidin dimer2   | Prodelphinidin dimer2   | Proanthocyanidin | $C_{30}H_{26}O_{14}$ | 611.13953  | 611.13986  | 0.5  | 609.1250  | 609.1283  | -3.5 | 1.80 |
| Prodelphinidin dimer3   | Prodelphinidin dimer3   | Proanthocyanidin | $C_{30}H_{26}O_{13}$ | 595.14461  | 595.14490  | 0.5  | 593.1301  | 593.1280  | -3.5 | 2.15 |
| Prodelphinidin dimer4   | Prodelphinidin dimer4   | Proanthocyanidin | $C_{30}H_{26}O_{13}$ | 595.14461  | 595.14472  | 0.2  | 593.1301  | 593.1281  | -3.4 | 2.40 |
| Prodelphinidin dimer5   | Prodelphinidin dimer5   | Proanthocyanidin | $C_{30}H_{26}O_{13}$ | 595.14461  | 595.14473  | 0.2  | 593.1301  | 593.1283  | -2.9 | 3.00 |
| Prodelphinidin tetramer | Prodelphinidin tetramer | Proanthocyanidin | $C_{60}H_{50}O_{27}$ | 1203.26122 | 1203.26152 | 0.0  | 1201.2467 | 1201.2430 | -3.5 | 2.00 |
| Prodelphinidin trimer1  | Prodelphinidin trimer1  | Proanthocyanidin | $C_{45}H_{36}O_{21}$ | 913.18210  | 913.18215  | 0.0  | 911.1676  | 911.1646  | -3.4 | 1.80 |
| Prodelphinidin trimer2  | Prodelphinidin trimer2  | Proanthocyanidin | $C_{45}H_{38}O_{21}$ | 915.19783  | 915.19782  | 0.0  | 913.1833  | 913.1800  | -3.6 | 1.80 |
| Prodelphinidin trimer3  | Prodelphinidin trimer3  | Proanthocyanidin | $C_{45}H_{38}O_{20}$ | 899.20291  | 899.20299  | 0.1  | 897.1884  | 897.1850  | -3.8 | 2.00 |
| Prodelphinidin trimer4  | Prodelphinidin trimer4  | Proanthocyanidin | $C_{45}H_{38}O_{19}$ | 883.20800  | 883.20782  | -0.2 | 881.1935  | 881.1906  | -3.2 | 2.00 |
| Prodelphinidin trimer5  | Prodelphinidin trimer5  | Proanthocyanidin | $C_{45}H_{38}O_{19}$ | 883.20800  | 883.20778  | -0.3 | 881.1935  | 881.1911  | -2.7 | 2.25 |
| Prodelphinidin trimer6  | Prodelphinidin trimer6  | Proanthocyanidin | $C_{45}H_{38}O_{19}$ | 883.20800  | 883.20751  | -0.5 | 881.1935  | 881.1902  | -3.7 | 2.50 |

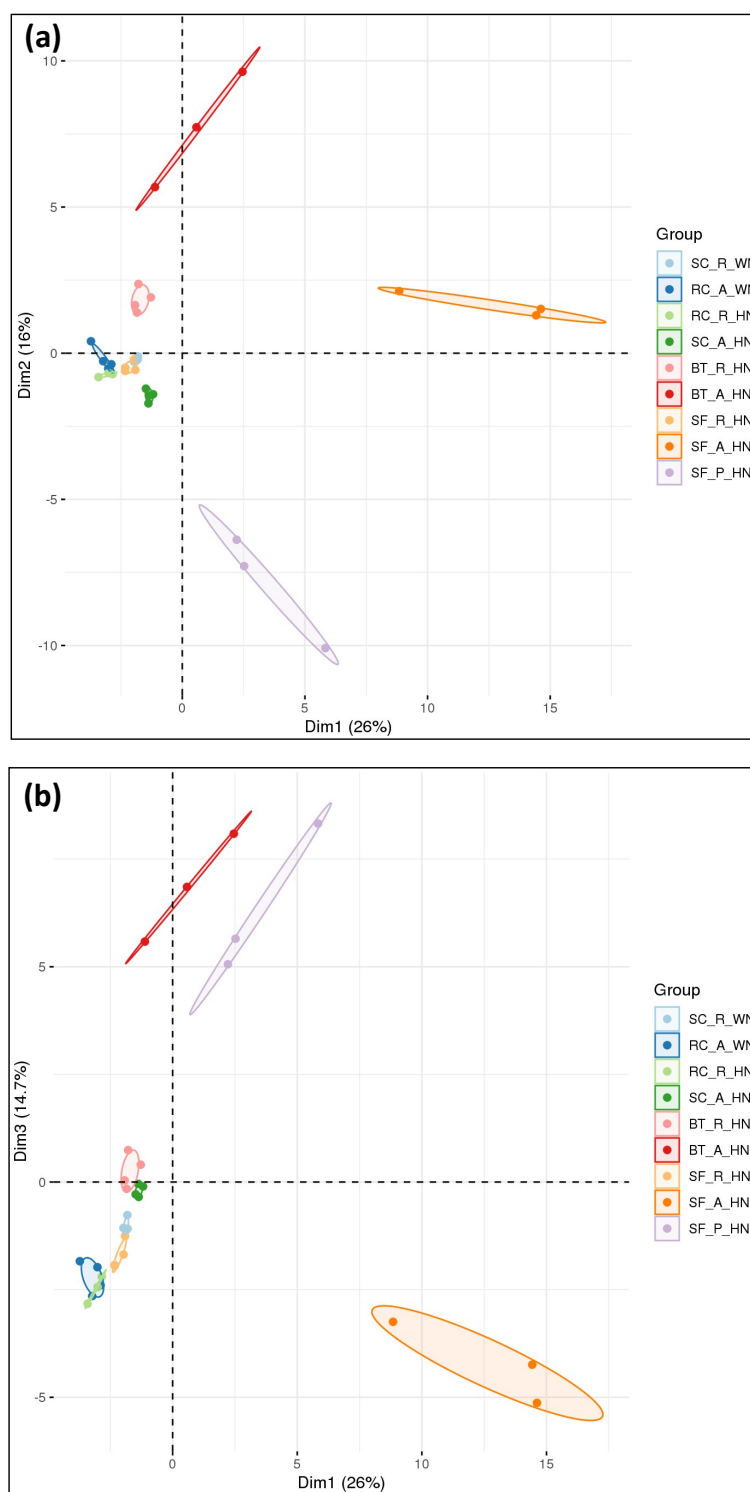

**Supplementary Figure S2.** Principal component analysis of metabolite contents in Fabaceae extracts. PCA was performed on relative amounts of all quantified compounds in the different Fabaceae extracts. Three or four replicates were performed for each analysis. The first two principal components explained 26% and 16% of the variance in the different groups of extracts, respectively **(a)**. The third principal components explained 14,7% **(b)**. SF: sainfoin, BT: birdsfoot trefoil, RC: red clover, SC: sweet clover. A: aerial parts, R: roots, P: pellets. HN: highly nematicidal; WN: weakly nematicidal extract.

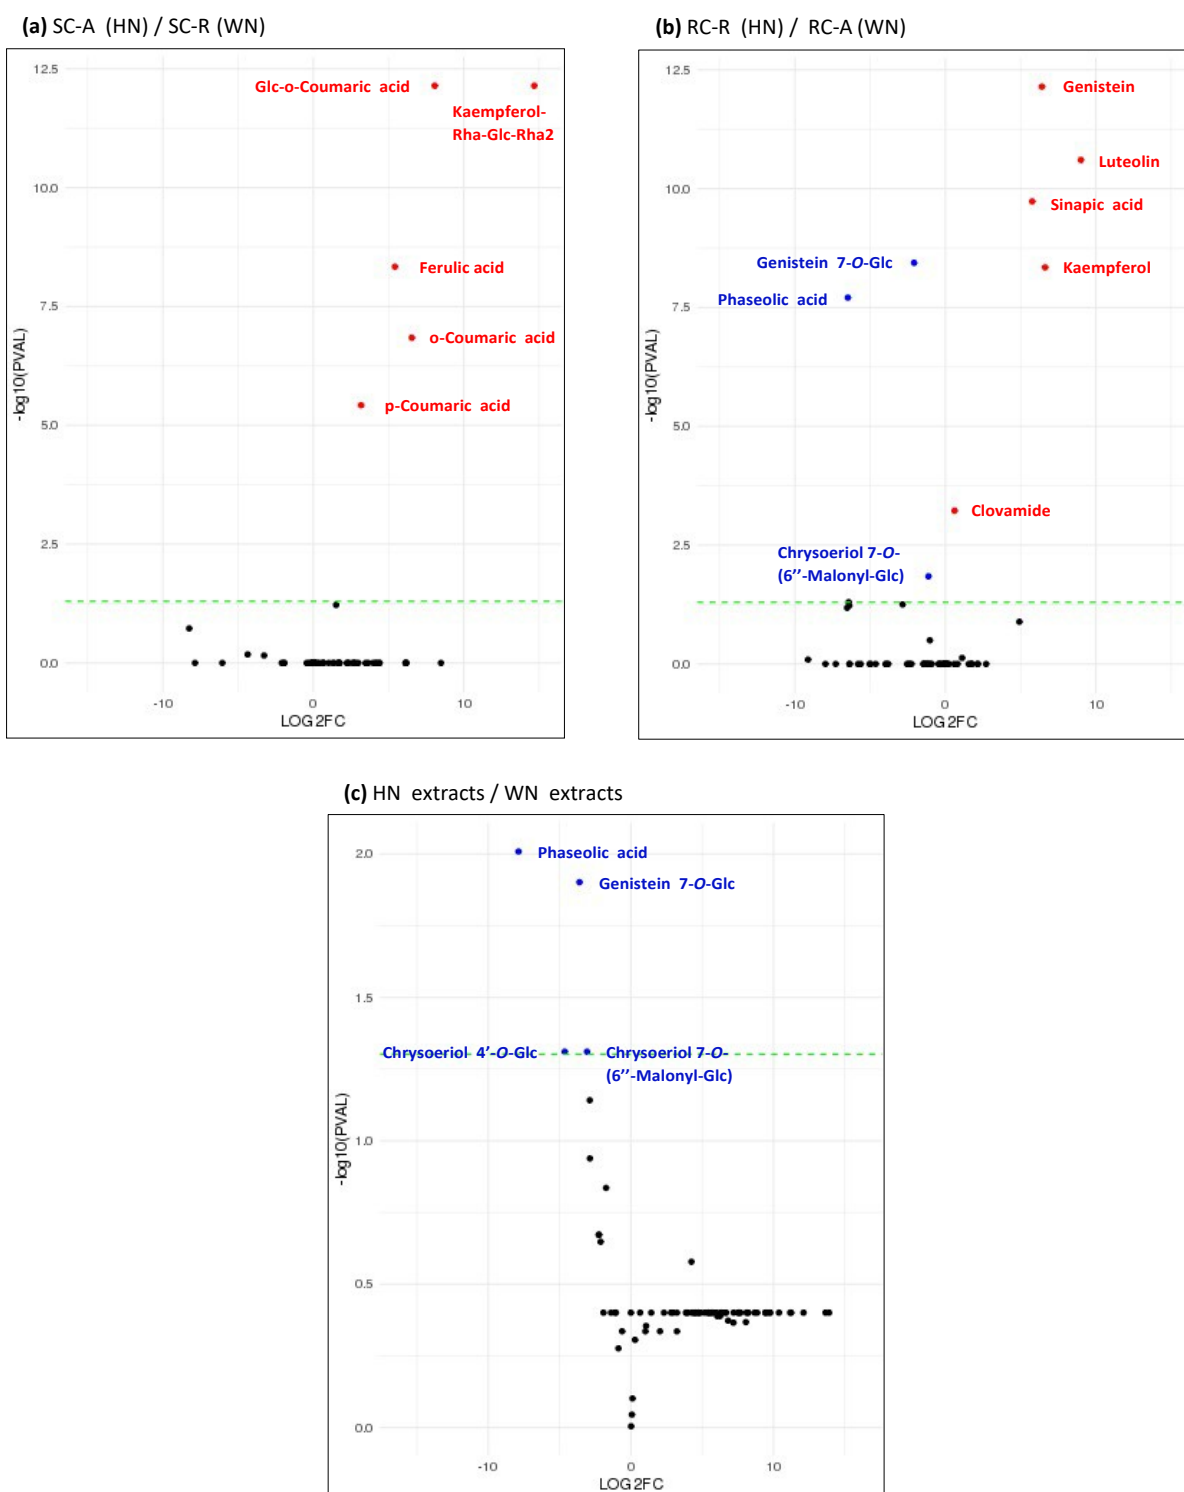

**Supplementary Figure S3.** Volcano plot analyses of differentially accumulated metabolites between highly nematocidal and weakly nematocidal Fabaceae extracts. Volcano plot analyses were used to identify significant differentially accumulated metabolites between the following plant extracts: **(a)** SC-A (HN) compared to SC-R (WN); **(b)** RC-R (HN) compared to RC-A (WN); **(c)** All HN Fabaceae extracts compared to all WN extracts; RC: red clover, SC: sweet clover. A: aerial parts, R: roots, HN: highly nematocidal, WN: weakly nematocidal. Red and blue colors indicate over-accumulated and under-accumulated metabolites, respectively. The green line indicates the significance threshold  $p$  value = 0.05.
